# Supplementary material
Source: MDPI journal article supplement (https://www.mdpi.com/1660-4601/18/8/4240)
Supplement: s2 [file s2]

Archive with 1 entries (1 files):
- ijerph-1151858-supplementary.pdf
